# Supplementary material for: Development of a miR-26 Companion Diagnostic Test for Adjuvant Interferon-alpha Therapy in Hepatocellular Carcinoma
Source: PubMed Central journal article supplement — Int J Biol Sci. 2013 Mar 16;9(3):303–12. doi: 10.7150/ijbs.6214 (PMC3619096; doi:10.7150/ijbs.6214), 2013-03-16
Supplement: ijbsv09p0303s1.pdf [file ijbsv09p0303s1.pdf]

# Supplementary Fig 1

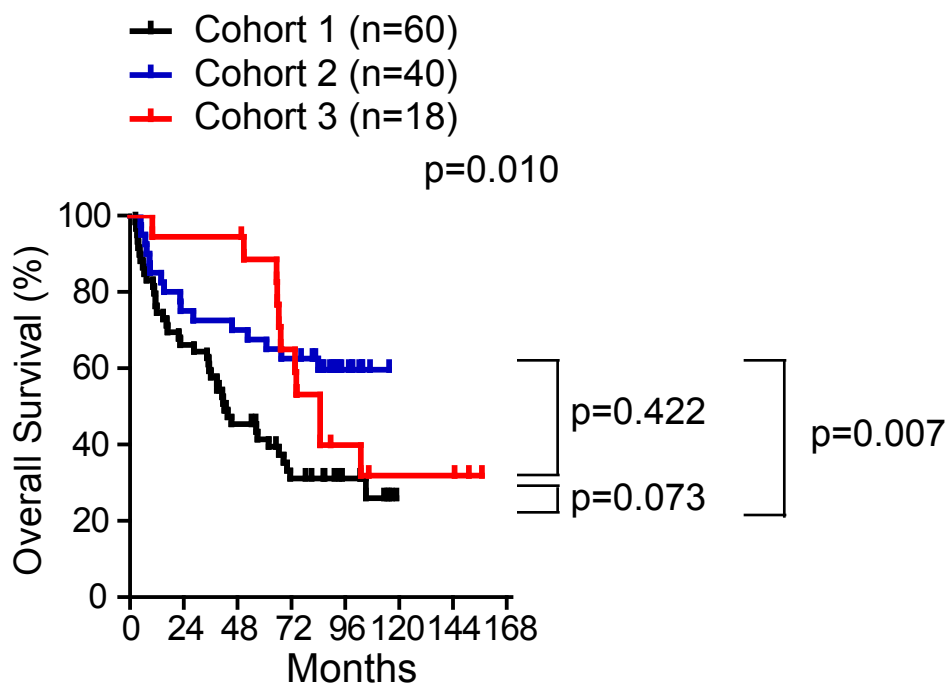

# Supplementary Fig 2

A

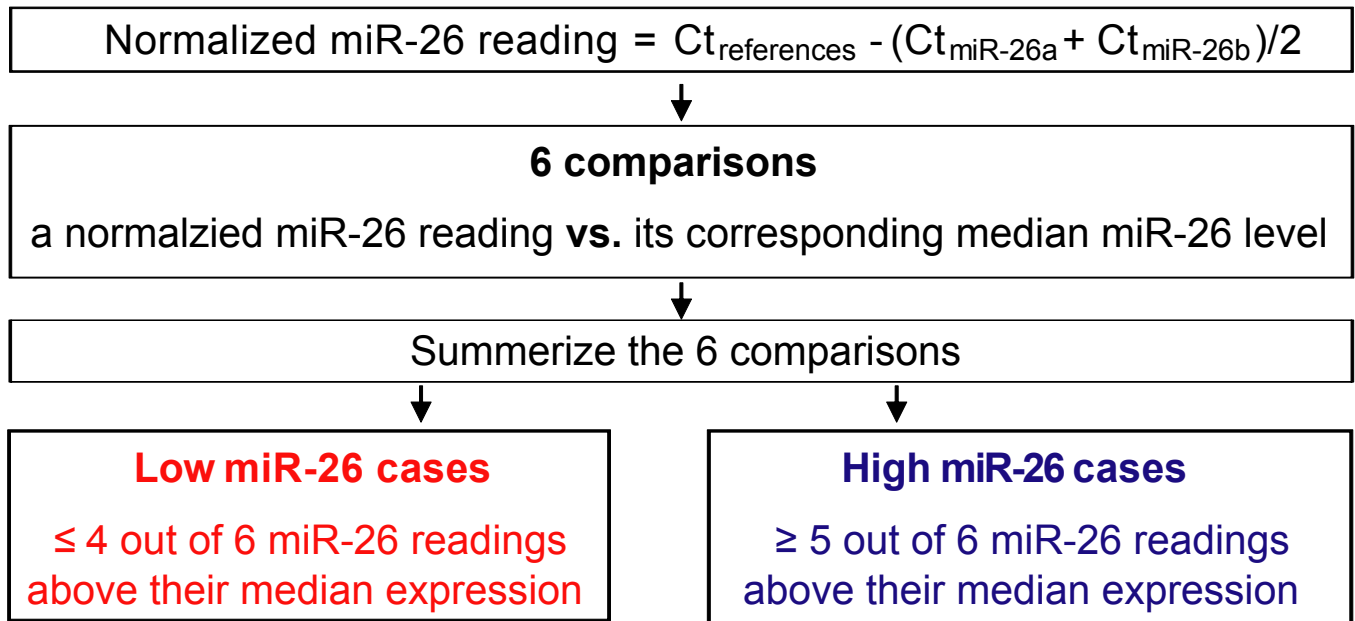

B

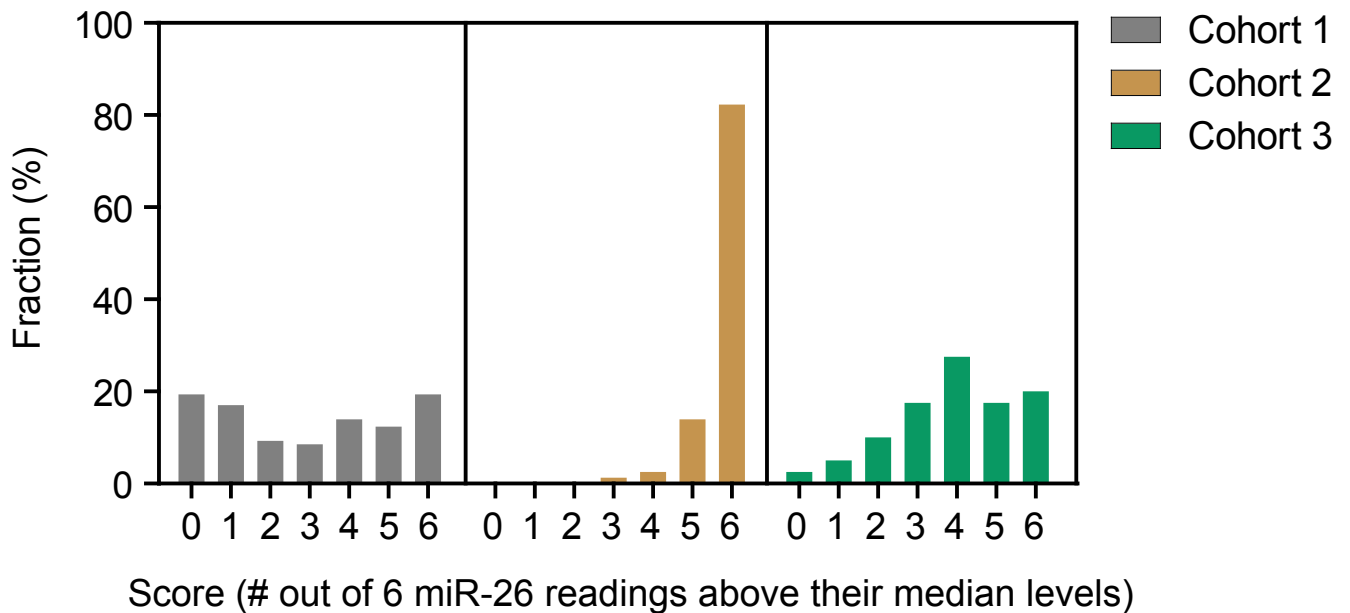

# Supplementary Fig 3

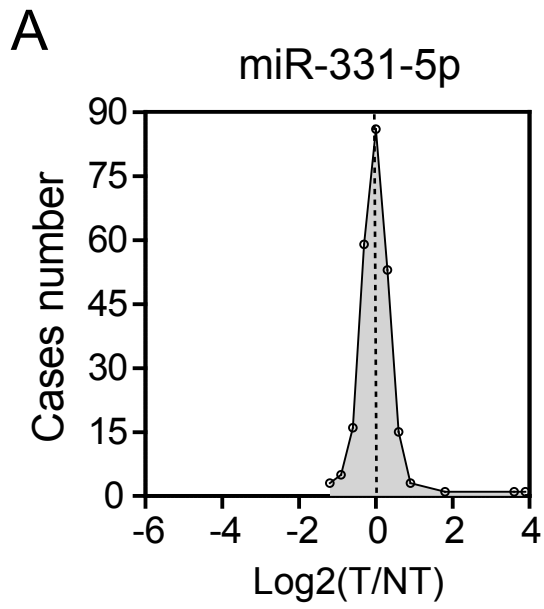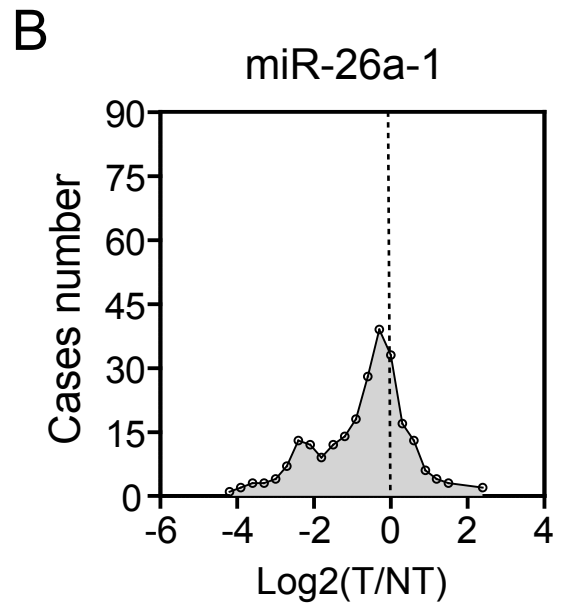

Supplementary table 1. Top 6 miRNAs that are ubiquitously expressed between HCC and non-tumor tissues

| Unique id          | Mature miR   | Median intensity<br>in Non-tumors | Tumor/Non-tumor |          |
|--------------------|--------------|-----------------------------------|-----------------|----------|
|                    |              |                                   | Median          | Variance |
| hsa-mir-331No2     | miR-331-5p   | 5016.62                           | 0.99            | 0.26     |
| hsa-mir-371No1     | miR-371-3p   | 3585.02                           | 0.98            | 0.27     |
| hsa-mir-138-2-prec | miR-138      | 512.47                            | 1.05            | 0.50     |
| hsa-mir-323No2     | miR-323-5p   | 659.20                            | 1.01            | 0.52     |
| hsa-mir-326No2     | miR-326-prec | 774.34                            | 1.05            | 0.53     |
| hsa-mir-126No1     | miR-126      | 1492.04                           | 1.06            | 0.70     |

<sup>a</sup>The analysis was performed on 241 HCC tumor tissues and their paired adjacent liver tissues with available microRNA array data using paired t-test. P>0.50; Median intensities in non-tumor tissues for each probe > median intensities of entire array.

Supplementary Table 2. Relative expression and variance of eight genes in non-tumor and tumor HCC tissues from three cohorts<sup>a</sup>.

| Genes                      | Mean of relative copy numbers (2.5%-97.5%) <sup>b</sup> |                     |                      |
|----------------------------|---------------------------------------------------------|---------------------|----------------------|
|                            | Non-Tumor                                               | Tumor               | P-Value <sup>c</sup> |
| <b>Cohort 1</b>            |                                                         |                     |                      |
| <b>Endogenous controls</b> |                                                         |                     |                      |
| miR-331-5p                 | 7.60 (5.11-8.90)                                        | 7.67 (4.98-9.45)    | 0.640                |
| RNU38b                     | 7.83 (2.06-10.01)                                       | 7.62 (1.84-10.24)   | 0.472                |
| U6B                        | 7.75 (1.30-10.19)                                       | 7.91 (1.30-10.93)   | 0.628                |
| RNU24                      | 8.85 (2.01-11.45)                                       | 9.04 (1.91-12.35)   | 0.589                |
| RNU44                      | 10.20 (3.66-12.98)                                      | 10.51 (1.90-14.51)  | 0.440                |
| U6SnRNA                    | 12.06 (2.81-16.04)                                      | 12.41 (4.63-16.88)  | 0.469                |
| <b>Tested miRs</b>         |                                                         |                     |                      |
| miR-26a                    | 12.08 (4.97-15.19)                                      | 11.18 (3.84-15.26)  | 0.034                |
| miR-26b                    | 12.31 (5.17-15.32)                                      | 11.47 (3.92-15.66)  | 0.047                |
| <b>Cohort 2</b>            |                                                         |                     |                      |
| <b>Endogenous controls</b> |                                                         |                     |                      |
| miR-331-5p                 | 8.40 (7.27-9.44)                                        | 8.37 (7.27-9.57)    | 0.715                |
| RNU38b                     | 7.74 (6.21-9.14)                                        | 7.91 (6.70-9.58)    | 0.171                |
| U6B                        | 8.12 (6.63-9.52)                                        | 8.43 (6.84-10.16)   | 0.140                |
| RNU44                      | 10.20 (7.45-12.23)                                      | 11.02 (8.52-13.89)  | <0.001               |
| RNU24                      | 8.58 (5.17-10.58)                                       | 9.02 (6.40-11.80)   | 0.034                |
| U6SnRNA                    | 12.78 (9.88-14.87)                                      | 13.15 (9.28-16.04)  | 0.159                |
| <b>Tested miRs</b>         |                                                         |                     |                      |
| miR-26a                    | 14.45 (13.24-15.65)                                     | 13.94 (12.33-15.33) | <0.001               |
| miR-26b                    | 14.85 (13.69-16.10)                                     | 14.50 (13.06-16.04) | 0.002                |
| <b>Cohort 3</b>            |                                                         |                     |                      |
| <b>Endogenous controls</b> |                                                         |                     |                      |
| miR-331-5p                 | 6.52 (4.39-7.65)                                        | 6.61 (5.61-7.36)    | 0.487                |
| RNU38b                     | 6.98 (2.15-8.65)                                        | 7.47 (3.08-9.13)    | 0.076                |
| U6B                        | 6.08 (1.89-7.70)                                        | 6.54 (0.91-8.35)    | 0.123                |
| RNU44                      | 9.75 (3.35-12.35)                                       | 10.82 (3.13-14.42)  | 0.065                |
| RNU24                      | 8.27 (2.46-10.71)                                       | 8.84 (1.67-11.67)   | 0.135                |
| U6SnRNA                    | 12.38 (2.69-15.92)                                      | 12.99 (3.71-16.53)  | 0.297                |
| <b>Tested miRs</b>         |                                                         |                     |                      |
| miR-26a                    | 12.53 (5.37-14.52)                                      | 12.35 (5.89-14.47)  | 0.656                |
| miR-26b                    | 10.98 (3.30-12.90)                                      | 10.92 (4.18-13.15)  | 0.885                |

<sup>a</sup> There are three cohorts involved in this study. Cohort 1: Tumor (n=129); Non-tumor (N=100). Cohort 2: Tumor (n=79); Non-tumor (n=79). Cohort 3: Tumor (n=40); Non-tumor (n=40).

<sup>b</sup> Relative copy numbers were in log(2) scale. The formula is Relative copy number = 36-Ct Value.

<sup>c</sup> Unpaired t-test.

Supplementary Table 3. Comparison of Clinical Characteristics between Low miR-26 cases and high miR-26 cases in three independent cohorts<sup>a</sup>.

| Clinical variable                 | Cohort 1             |                       |                    | Cohort 2            |                       |                    | Cohort 3             |                       |                    |
|-----------------------------------|----------------------|-----------------------|--------------------|---------------------|-----------------------|--------------------|----------------------|-----------------------|--------------------|
|                                   | Low miR-26<br>(n=88) | High miR-26<br>(n=41) | <i>p</i> -value    | Low miR-26<br>(n=3) | High miR-26<br>(n=76) | <i>p</i> -value    | Low miR-26<br>(n=25) | High miR-26<br>(n=15) | <i>p</i> -value    |
| <b>Gender</b>                     |                      |                       |                    |                     |                       |                    |                      |                       |                    |
| Female                            | 6                    | 6                     |                    | 0                   | 14                    |                    | 2                    | 2                     |                    |
| Male                              | 82                   | 35                    | 0.155 <sup>b</sup> | 3                   | 62                    | 0.155 <sup>b</sup> | 23                   | 13                    | 0.587 <sup>b</sup> |
| <b>Age-year</b>                   |                      |                       |                    |                     |                       |                    |                      |                       |                    |
| Median (range)                    | 51 (29-77)           | 48 (20-76)            | 0.227 <sup>b</sup> | 52 (48-66)          | 52 (24-75)            | 0.774 <sup>b</sup> | 66 (54-81)           | 65 (55-73)            | 0.949 <sup>b</sup> |
| <b>Alanine transaminase (ALT)</b> |                      |                       |                    |                     |                       |                    |                      |                       |                    |
| Normal (≤50U/L)                   | 72                   | 36                    |                    | 1                   | 43                    |                    | 7                    | 3                     |                    |
| Abnormal (>50U/L)                 | 12                   | 5                     | 0.749 <sup>b</sup> | 2                   | 33                    | 0.427 <sup>b</sup> | 18                   | 12                    | 0.572 <sup>b</sup> |
| Missing data                      | 4                    | 0                     |                    | 0                   | 0                     |                    | 0                    | 0                     |                    |
| <b>HBV</b>                        |                      |                       |                    |                     |                       |                    |                      |                       |                    |
| Negative                          | 5                    | 1                     |                    | 0                   | 9                     |                    | 0                    | 0                     |                    |
| Positive                          | 83                   | 40                    | 0.664 <sup>b</sup> | 3                   | 67                    | 1.000 <sup>b</sup> | 0                    | 0                     | /                  |
| <b>HCV</b>                        |                      |                       |                    |                     |                       |                    |                      |                       |                    |
| Negative                          | 88                   | 41                    |                    | 3                   | 71                    |                    | 0                    | 0                     |                    |
| Positive                          | 0                    | 0                     | /                  | 0                   | 3                     | 0.722 <sup>b</sup> | 25                   | 15                    | /                  |
| Missing data                      | 0                    | 0                     |                    | 0                   | 2                     |                    | 0                    | 0                     |                    |
| <b>Tumor size-cm</b>              |                      |                       |                    |                     |                       |                    |                      |                       |                    |
| ≤3                                | 56                   | 24                    |                    | 1                   | 21                    |                    | 17                   | 8                     |                    |
| >3                                | 32                   | 17                    | 0.578 <sup>b</sup> | 2                   | 55                    | 0.829 <sup>b</sup> | 8                    | 7                     | 0.354 <sup>b</sup> |
| <b>Multinodular</b>               |                      |                       |                    |                     |                       |                    |                      |                       |                    |
| No                                | 75                   | 35                    |                    | 2                   | 61                    |                    | 21                   | 12                    |                    |
| Yes                               | 13                   | 6                     | 0.984 <sup>b</sup> | 1                   | 15                    | 0.566 <sup>b</sup> | 4                    | 3                     | 0.747 <sup>b</sup> |
| <b>TNM Stage</b>                  |                      |                       |                    |                     |                       |                    |                      |                       |                    |
| I                                 | 51                   | 28                    |                    | 0                   | 7                     |                    | 6                    | 1                     |                    |
| II                                | 18                   | 10                    |                    | 0                   | 34                    |                    | 13                   | 11                    |                    |
| III-IV                            | 11                   | 3                     | 0.588 <sup>b</sup> | 3                   | 35                    | 0.186 <sup>b</sup> | 6                    | 3                     | 0.303 <sup>b</sup> |
| Missing data                      | 8                    | 0                     |                    | 0                   | 0                     |                    | 0                    | 0                     |                    |
| <b>Alpha fetoprotein (AFP)</b>    |                      |                       |                    |                     |                       |                    |                      |                       |                    |
| Negative (≤20ng/ml)               | 32                   | 17                    |                    | 1                   | 32                    |                    | 17                   | 11                    |                    |
| Positive (>20ng/ml)               | 56                   | 24                    | 0.578 <sup>b</sup> | 2                   | 44                    | 0.763 <sup>b</sup> | 8                    | 4                     | 0.722 <sup>b</sup> |
| <b>Survival-month</b>             |                      |                       |                    |                     |                       |                    |                      |                       |                    |
| Median (range)                    | 37 (2-119)           | 45 (6-116)            | 0.058 <sup>c</sup> | 9 (9)               | >116 (5-116)          | 0.034 <sup>c</sup> | 76 (50-145)          | 85 (51-157)           | 0.835 <sup>c</sup> |

<sup>a</sup>Low miR-26 and high miR-26 groups were assigned by miR-26DX; <sup>b</sup>Chi-square test; <sup>c</sup>Log-rank test
